# Supplementary material for: Impact of Wines and Wine Constituents on Cyclooxygenase-1, Cyclooxygenase-2, and 5-Lipoxygenase Catalytic Activity
Source: Mediators Inflamm. 2014 May 29;2014:178931. doi: 10.1155/2014/178931 (PMC4058118; doi:10.1155/2014/178931)
Supplement: Supplementary file 1 — Supplementary Table provides information about variety, producer, vintage, origin (country and region), and type for each wine tested in this study. [file 178931.f1.xlsx]

## Sheet: Supplementary Table 1
No	Variety	Producer	Vintage	Origin	Type of wine
1	Pinot Noir	Vinium Velké Pavlovice	2008	Moravia, Czech Republic	Red dry
2	Pinot noir	Augustinian cellar Neoklas	2010	Moravia, Czech Republic	Red dry
3	Pinot noir	Gsellmann & Hans	2007	Burgenland, Austria	Red dry
4	Pinot noir	Virely Arcelain	2008	Bourgogne, France	Red dry
5	Pinot noir	André Goichot	2007	Bourgogne, France	Red dry
6	Cabernet Sauvignon	Famiglia Cielo	2010	Venezia, Italy	Red dry
7	Cabernet Sauvignon	Folonari	2010	Venezia, Italy	Red dry
8	Cabernet Sauvignon	Brise de France	2010	France	Red dry
9	Cabernet Sauvignon	Jean D´Aosque	2011	Languedoc, France	Red dry
10	Cabernet Sauvignon	Víno Mikulov		Moravia, Czech Republic	Red dry
11	Cabernet Sauvignon	Templar cellars Čejkovice	2008	Moravia, Czech Republic	Red dry
12	Cabernet Sauvignon	Teliani valley PLC	2005	Teliany micro-zone in Kakheti, Georgia	Red dry
13	Cabernet Moravia	Templar cellars Čejkovice		Moravia, Czech Republic	Red dry
14	Cabernet Moravia	Vinselekt Michlovský	2007	Moravia, Czech Republic	Red dry
15	Saperavi	P.E. Givi Nikolashvilli Botteled by Manavi wine celler	2008	Gurjaani, Georgia	Red dry
16	Saperavi	Teliani valley PLC	2007	Tsinandali micro-zone in Kakheti, Georgia	Red dry (aged in oak unfiltered)
17	Saperavi	Teliani valley PLC	2005	Napareuli micro-zone in Kakheti, Georgia	Red dry
18	Saperavi	Teliani valley PLC	2006	Mukuzani micro-zone in Kakheti, Georgia	Red dry
19	Saperavi	Teliani valley PLC	2004	Kindzmarauli micro-zone in Kakheti, Georgia	Red semi-sweet
20	Saperavi	Geovan Wine	2006	Kakheti, Georgia	Red dry
21	Saperavi	Tbilvino	2010	Kakheti, Georgia	Red dry
22	Saperavi	Kindzmaraulis Marani	2009	Kindzmarauli micro-zone in Kakheti, Georgia	Red dry
23	Saperavi	Kindzmaraulis Marani	2007	Kindzmarauli micro-zone in Kakheti, Georgia	Red dry (barrel aged)
24	Saperavi + Saperavi Budeshuriseburi	Kindzmaraulis Marani	2005	Kakheti, Kvareli micro-zone, Georgia	Red dry
25	Saperavi (95%) + Saperavi Budeshuriseburi (5%)	Kindzmaraulis Marani		Kindzmarauli micro-zone in Kakheti, Georgia	Red dry (fermented 25-30 days)
26	Alexandrouli	Chrebalo Winery	2007	Ambrolauri district in Racha, Georgia	Red dry
27	Chardonnay	Vinium Velké Pavlovice	2011	Moravia, Czech Republic	White dry
28	Chardonnay	Chateau Valtice		Moravia, Czech Republic	White dry
29	Chardonnay	Folonari	2010	Venezia, Italy	White dry
30	Chardonnay	Delibori	2010	Venezia, Italy	White dry
31	Chardonnay	Joseph Castalan	2011	Pays d´oc, France	White dry
32	Chardonnay	André Goichot	2010	Bourgogne, France	White dry
33	Sauvignon Blanc	Famiglia Cielo	2010	Venezia, Italy	White dry
34	Sauvignon Blanc	Brise de France	2011	France	White dry
35	Sauvignon Blanc	Vinium Velké Pavlovice	2008	Moravia, Czech Republic	White dry
36	Rkatsiteli	Institute of Horticulture, Viticulture and Oenology	2010	Kakheti, Georgia	White dry (fermented by Kakhetian meathod)
37	Rkatsiteli	Tbilvino	2009	Kakheti, Georgia	White dry
38	Rkatsiteli (50%) + Mtsvane Kakhuri (20%) + Khikhvi (15%) +Kisi (15%)	Kindzmaraulis Marani		Kindzmarauli micro-zone in Kakheti, Georgia	White dry (fermented by Kakhetian meathod)
39	Rkatsiteli + Mtsvane	Geovan Wine	2008	Kakheti, Georgia	White dry
